# Supplementary material for: Choices for long-term hypertensive control in patients after first-ever hemorrhagic stroke: a nationwide cohort study
Source: PubMed Central journal article supplement — Ther Adv Neurol Disord. 2018 Sep 28;11:1756286418802688. doi: 10.1177/1756286418802688 (PMC6166309; doi:10.1177/1756286418802688), 2018-09-28
Supplement: Supplemental_Table_20180618_Final.pdf [file Supplemental_Table_20180618_Final.pdf]

Supplemental Figure 1. Methods and results of validation study.

## **Methods**

The SRICHS is an electronic chart-based stroke registry system recording clinical data of all admitted patients with a diagnosis of stroke (ICD-9-CM codes 430-437) in the Chang-Gung Healthcare System. The registered data is regularly checked for accuracy and assumed to be the gold standard in this validation study. We extracted the data of patients with the primary diagnosis of HS from both the SRICHS and NHIRD between 2009 and 2013. We then linked the two databases using date of birth, sex, primary diagnosis at discharge, admission date, and discharge date. This linking procedure helped to improve the accuracy of NHIRD by reducing bias such as incorrect coding.

## **Results**

Among 114,219 HS patients in the NHIRD, a total of 2,343 patients in the SRICHS were matched for validation study. The positive predictive values of HS and first-ever HS were 97.98% and 90.54% in the NHIRD database, respectively (Supplemental Figure 1). Of the 16,693 eligible first-ever HS patients in the NHIRD, a total of 234 patients in the SRICHS were further matched. The mean admission systolic BP of these matched patients were  $154.4 \pm 24.8$ ,  $154.3 \pm 28.0$ , and  $137.8 \pm 22.4$  mmHg in the ACEI/ARB, CCB, and comparison groups ( $p = 0.02$ ), while the diastolic BP were  $91.2 \pm 18.3$ ,  $89.9 \pm 16.5$ , and  $80.7 \pm 14.1$  mmHg in the ACEI/ARB, CCB, and comparison groups ( $p = 0.04$ ), respectively.

A. Validated ICH (ICD-9 code: 431.xx) diagnoses (n = 1,634) in NHIRD

|       |   | SRICHs |    |                    |
|-------|---|--------|----|--------------------|
|       |   | +      | -  |                    |
| NHIRD | + | 1,601  | 33 | 1,634 <sup>a</sup> |
|       | - | -      | -  |                    |

a. linked cases between NHIRD and SRICHs

PPV=1,601/1,634=97.98%

B. Validated first ever ICH diagnoses (n = 1,554) in NHIRD

|       |   | SRICHs |     |                    |
|-------|---|--------|-----|--------------------|
|       |   | +      | -   |                    |
| NHIRD | + | 1,407  | 147 | 1,554 <sup>a</sup> |
|       | - | -      | -   |                    |

a. linked cases between NHIRD and SRICHs

PPV=1,407/1,554=90.54%

HS, hemorrhagic stroke; ICD-9 CM, International Classification of Diseases, Ninth Revision, Clinical Modification; NHIRD, National Health Insurance Research Database; PPV, positive predictive value; SRICHs, Stroke Registry In Chang-Gung Healthcare System.

Supplemental Figure 2. Comparisons of cumulative incidence of ischemic stroke between the study groups.

The cumulative incidence compares the time to ischemic stroke between the study groups. The multivariate adjusted survival curves of the ACEI/ARB (A) and CCB (B) groups show a similar trend of ischemic stroke compared to the comparison group. The CCB and ACEI/ARB groups have similar risk of ischemic stroke throughout the follow-up period (C).

ACEI, angiotensin-converting enzyme inhibitor; ARB, angiotensin II receptor blocker; CCB, calcium channel blocker.

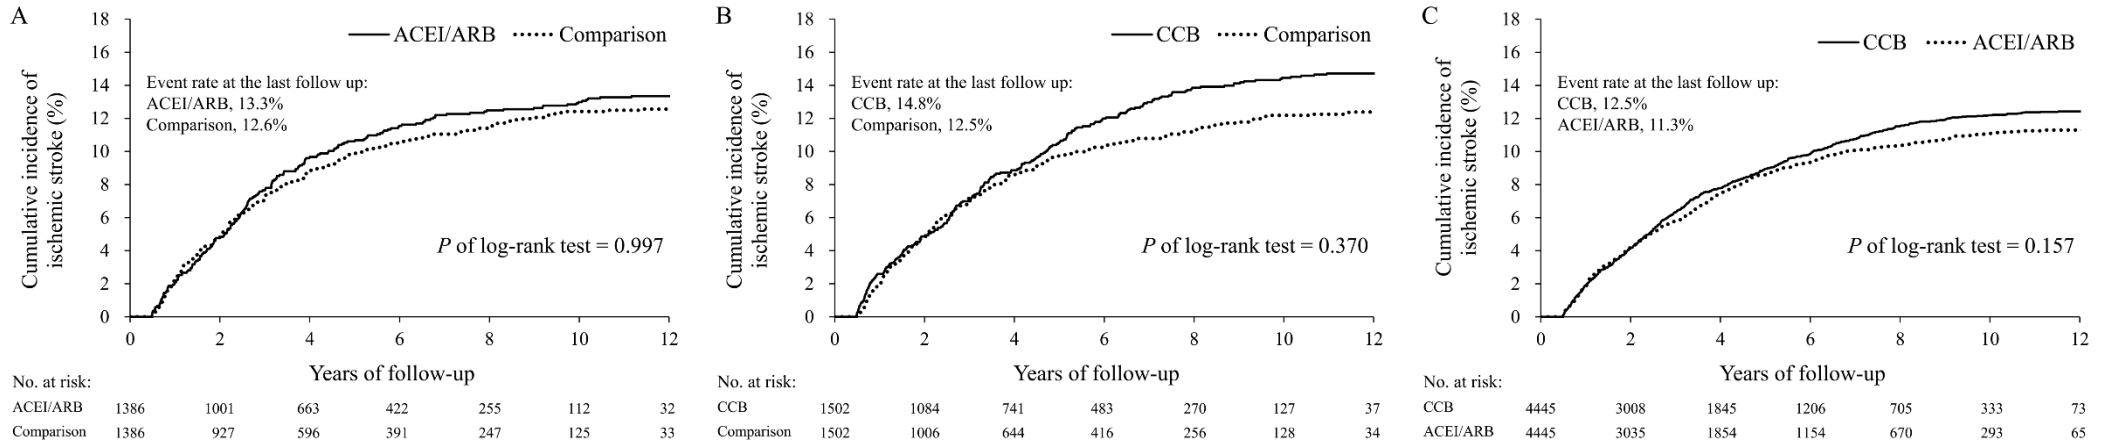

Supplemental Figure 3. Comparisons of cumulative incidence of recurrent hemorrhagic stroke between the study groups.

The cumulative incidence compares the time to recurrent hemorrhagic stroke between the study groups. The multivariate adjusted survival curves of the ACEI/ARB (A) and CCB (B) groups show a similar trend of recurrent hemorrhagic stroke compared to the comparison group. The CCB and ACEI/ARB groups have similar risk of recurrent hemorrhagic stroke throughout the follow-up period (C).

ACEI, angiotensin-converting enzyme inhibitor; ARB, angiotensin II receptor blocker; CCB, calcium channel blocker.

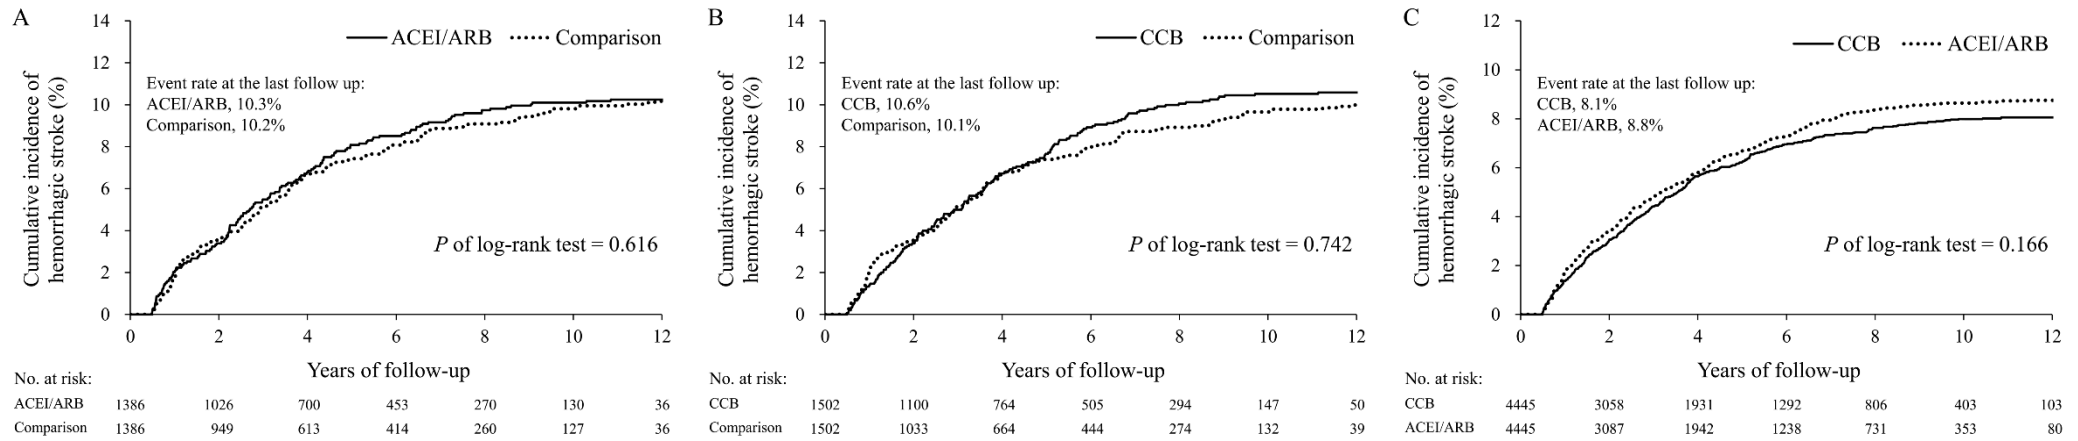

Supplemental Table 1. ICD-9-CM code used for diagnosis in the current study

| Variable                              | Code                                                                                                                                                                  |
|---------------------------------------|-----------------------------------------------------------------------------------------------------------------------------------------------------------------------|
| Hemorrhage stroke                     | 431.xx                                                                                                                                                                |
| Previous myocardial infarction        | 410.xx, 412.xx                                                                                                                                                        |
| Ischemic stroke                       | 433.xx–435.xx, excluding 433.00,<br>433.10, 433.20, 433.30, 433.80, 433.90,<br>434.00, 434.10, 434.90                                                                 |
| Coronary artery disease               | 410.xx–414.xx                                                                                                                                                         |
| Chronic kidney disease                | 580.xx–589.xx, 403.xx–404.xx, 016.0x,<br>095.4x, 236.9x, 250.4x, 274.1x, 442.1x,<br>447.3x, 440.1x, 572.4x, 642.1x, 646.2x,<br>753.1x, 283.11, 403.01, 404.02, 446.21 |
| Hemodialysis                          | 585.xx (Catastrophic illness certificate)                                                                                                                             |
| Chronic obstructive pulmonary disease | 491.xx, 492.xx, 496.xx                                                                                                                                                |
| Atrial fibrillation                   | 427.31                                                                                                                                                                |
| Diabetes mellitus                     | 250.xx                                                                                                                                                                |
| Dyslipidemia                          | 272.xx                                                                                                                                                                |
| Malignancy                            | 140.xx–208.xx (Catastrophic illness<br>certificate)                                                                                                                   |
| Cirrhosis                             | 571.2, 571.5, 571.6                                                                                                                                                   |
| Cardiovascular death                  |                                                                                                                                                                       |
| Acute myocardial infarction           | 410.xx                                                                                                                                                                |
| Sudden cardiac death                  | 427.5                                                                                                                                                                 |
| Heart failure                         | 428.xx                                                                                                                                                                |
| Cardiogenic shock                     | 785.51                                                                                                                                                                |
| Any stroke                            | 430.xx–437.xx                                                                                                                                                         |
| Dysrhythmia                           | 427.xx                                                                                                                                                                |
| Pulmonary embolism                    | 415.1, 415.11, 415.19                                                                                                                                                 |
| Aortic aneurysm dissection            | 441.xx                                                                                                                                                                |
| Peripheral arterial disease           | 443.9                                                                                                                                                                 |

Supplemental Table 2. Proportions of patients receiving non-study medications before propensity score matching

| Characteristics                              | CCB<br>( <i>n</i> = 10,400) | ACEI/ARB<br>( <i>n</i> = 4,708) | Comparison<br>( <i>n</i> = 1,585) | <i>P</i> |
|----------------------------------------------|-----------------------------|---------------------------------|-----------------------------------|----------|
| Non-antihypertensive medications (ATC codes) |                             |                                 |                                   |          |
| Anti-thrombotic agent                        |                             |                                 |                                   |          |
| Aspirin (B01AC06)                            | 766 (7.4)                   | 507 (10.8)                      | 163 (10.3)                        | <0.001   |
| Clopidogrel (B01AC04)                        | 59 (0.6)                    | 79 (1.7)                        | 19 (1.2)                          | <0.001   |
| Warfarin (B01AA)                             | 53 (0.5)                    | 86 (1.8)                        | 56 (3.5)                          | <0.001   |
| Lipid lowering agent                         |                             |                                 |                                   |          |
| Statin (C10AA)                               | 686 (6.6)                   | 590 (12.5)                      | 106 (6.7)                         | <0.001   |
| T2DM medication                              |                             |                                 |                                   |          |
| Insulin (A10A)                               | 179 (1.7)                   | 185 (3.9)                       | 67 (4.2)                          | <0.001   |
| Metformin (A10BA)                            | 801 (7.7)                   | 632 (13.4)                      | 146 (9.2)                         | <0.001   |
| Thiazolidinediones<br>(A10BG02, A10BG03)     | 46 (0.4)                    | 72 (1.5)                        | 13 (0.8)                          | <0.001   |
| Sulfonylurea (A10BB)                         | 822 (7.9)                   | 609 (12.9)                      | 153 (9.7)                         | <0.001   |

CCB, calcium channel blocker; ACEI, angiotensin-converting enzyme inhibitor; ARB, angiotensin II receptor blocker; T2DM, Diabetes mellitus type 2; ATC code, Anatomical Therapeutic Chemical code.

Supplemental Table 3. Baseline characteristics of the study patients in the ACEI/ARB and comparison groups after propensity score matching

| Characteristics                                         | ACEI/ARB<br>( <i>n</i> = 1,386) | Comparison<br>( <i>n</i> = 1,386) | <i>P</i> |
|---------------------------------------------------------|---------------------------------|-----------------------------------|----------|
| Age (years)                                             | 66.1±13.8                       | 65.4±14.5                         | 0.168    |
| Age group                                               |                                 |                                   | 0.545    |
| < 40                                                    | 49 (3.5)                        | 53 (3.8)                          |          |
| 40–75                                                   | 896 (64.6)                      | 918 (66.2)                        |          |
| > 75                                                    | 441 (31.8)                      | 415 (29.9)                        |          |
| Gender                                                  |                                 |                                   | 0.754    |
| Male                                                    | 867 (62.6)                      | 859 (62.0)                        |          |
| Female                                                  | 519 (37.4)                      | 527 (38.0)                        |          |
| Previous myocardial infarction                          | 29 (2.1)                        | 29 (2.1)                          | 1.000    |
| Previous ischemic stroke                                | 94 (6.8)                        | 77 (5.6)                          | 0.180    |
| Previous antiplatelet use                               | 378 (27.3)                      | 354 (25.5)                        | 0.301    |
| Previous anticoagulant use                              | 63 (4.5)                        | 59 (4.3)                          | 0.711    |
| Comorbidity                                             |                                 |                                   |          |
| Coronary artery disease                                 | 231 (16.7)                      | 220 (15.9)                        | 0.571    |
| Chronic kidney disease                                  | 32 (2.3)                        | 35 (2.5)                          | 0.711    |
| Hemodialysis                                            | 8 (0.6)                         | 9 (0.6)                           | 0.808    |
| Chronic obstructive pulmonary disease                   | 147 (10.6)                      | 147 (10.6)                        | 1.000    |
| Atrial fibrillation                                     | 73 (5.3)                        | 69 (5.0)                          | 0.730    |
| Diabetes mellitus                                       | 305 (22.0)                      | 302 (21.8)                        | 0.890    |
| Dyslipidemia                                            | 186 (13.4)                      | 179 (12.9)                        | 0.694    |
| Malignancy                                              | 61 (4.4)                        | 59 (4.3)                          | 0.852    |
| NIHSS                                                   | 15.6±7.2                        | 15.5±7.4                          | 0.520    |
| NIHSS group                                             |                                 |                                   | 0.818    |
| ≤ 5                                                     | 160 (11.5)                      | 158 (11.4)                        |          |
| 6-13                                                    | 382 (27.6)                      | 397 (28.6)                        |          |
| > 13                                                    | 844 (60.9)                      | 831 (60.0)                        |          |
| Follow up years (not matched)                           | 5.0±3.4                         | 4.7±3.5                           | 0.026    |
| Anti-thrombotic agent                                   |                                 |                                   |          |
| Aspirin                                                 | 162 (11.7)                      | 144 (10.4)                        | 0.275    |
| Clopidogrel                                             | 20 (1.4)                        | 19 (1.4)                          | 0.872    |
| Warfarin                                                | 38 (2.7)                        | 38 (2.7)                          | 1.000    |
| Lipid lowering agent                                    |                                 |                                   |          |
| Statin                                                  | 112 (8.1)                       | 103 (7.4)                         | 0.523    |
| T2DM medication                                         |                                 |                                   |          |
| Insulin                                                 | 57 (4.1)                        | 56 (4.0)                          | 0.923    |
| Metformin                                               | 140 (10.1)                      | 137 (9.9)                         | 0.849    |
| Thiazolidinediones                                      | 11 (0.8)                        | 12 (0.9)                          | 0.834    |
| Sulfonylurea                                            | 150 (10.8)                      | 139 (10.0)                        | 0.494    |
| Numbers of antihypertensive drug class used at baseline |                                 |                                   | 0.682    |
| 1                                                       | 994 (71.7)                      | 980 (70.7)                        |          |
| 2                                                       | 332 (24.0)                      | 337 (24.3)                        |          |
| ≥ 3                                                     | 60 (4.3)                        | 69 (5.0)                          |          |
| Add on within two years (not matched)                   |                                 |                                   |          |
| Antihypertensive drug not of interest                   |                                 |                                   |          |
| Beta-blocker                                            | 81 (5.8)                        | 21 (1.5)                          | <0.001   |
| Alpha-blocker                                           | 28 (2.0)                        | 12 (0.9)                          | 0.011    |

|                                       |            |            |        |
|---------------------------------------|------------|------------|--------|
| Other                                 | 9 (0.6)    | 8 (0.6)    | 0.808  |
| Diuretics not of interest             |            |            |        |
| Thiazide                              | 40 (2.9)   | 20 (1.4)   | 0.009  |
| Loop diuretics                        | 84 (6.1)   | 67 (4.8)   | 0.155  |
| Spironolactone                        | 24 (1.7)   | 23 (1.7)   | 0.883  |
| Number of drugs used within two years |            |            | <0.001 |
| 0                                     | 163 (11.8) | 239 (17.2) |        |
| 1                                     | 821 (59.2) | 822 (59.3) |        |
| ≥ 2                                   | 402 (29.0) | 325 (23.4) |        |

---

ACEI, angiotensin-converting enzyme inhibitor; ARB, angiotensin II receptor blocker; NIHSS, National Institutes of Health Stroke Scale; T2DM, Diabetes mellitus type 2.



Supplemental Table 4. Baseline characteristics of the study patients in the CCB and comparison groups after propensity score matching

| Characteristics                                         | CCB<br>( <i>n</i> = 1,502) | Comparison<br>( <i>n</i> = 1,502) | <i>P</i> |
|---------------------------------------------------------|----------------------------|-----------------------------------|----------|
| Age (years)                                             | 65.4±13.8                  | 65.1±14.6                         | 0.675    |
| Age group                                               |                            |                                   | 0.869    |
| < 40                                                    | 59 (3.9)                   | 64 (4.3)                          |          |
| 40–75                                                   | 995 (66.2)                 | 985 (65.6)                        |          |
| > 75                                                    | 448 (29.8)                 | 453 (30.2)                        |          |
| Gender                                                  |                            |                                   | 0.385    |
| Male                                                    | 958 (63.8)                 | 935 (62.3)                        |          |
| Female                                                  | 544 (36.2)                 | 567 (37.7)                        |          |
| Previous myocardial infarction                          | 27 (1.8)                   | 25 (1.7)                          | 0.780    |
| Previous ischemic stroke                                | 90 (6.0)                   | 83 (5.5)                          | 0.584    |
| Previous antiplatelet use                               | 364 (24.2)                 | 359 (23.9)                        | 0.831    |
| Previous anticoagulant use                              | 50 (3.3)                   | 54 (3.6)                          | 0.690    |
| Comorbidity                                             |                            |                                   |          |
| Coronary artery disease                                 | 219 (14.6)                 | 219 (14.6)                        | 1.000    |
| Chronic kidney disease                                  | 35 (2.3)                   | 38 (2.5)                          | 0.722    |
| Hemodialysis                                            | 8 (0.5)                    | 9 (0.6)                           | 0.808    |
| Chronic obstructive pulmonary disease                   | 159 (10.6)                 | 153 (10.2)                        | 0.720    |
| Atrial fibrillation                                     | 61 (4.1)                   | 68 (4.5)                          | 0.529    |
| Diabetes mellitus                                       | 312 (20.8)                 | 306 (20.4)                        | 0.787    |
| Dyslipidemia                                            | 192 (12.8)                 | 182 (12.1)                        | 0.581    |
| Malignancy                                              | 69 (4.6)                   | 69 (4.6)                          | 1.000    |
| NIHSS                                                   | 15.8±7.2                   | 15.7±7.3                          | 0.700    |
| NIHSS group                                             |                            |                                   | 0.311    |
| ≤ 5                                                     | 174 (11.6)                 | 163 (10.9)                        |          |
| 6-13                                                    | 376 (25.0)                 | 412 (27.4)                        |          |
| > 13                                                    | 952 (63.4)                 | 927 (61.7)                        |          |
| Follow up years (not matched)                           | 5.1±3.4                    | 4.7±3.4                           | <0.001   |
| Anti-thrombotic agent                                   |                            |                                   |          |
| Aspirin                                                 | 171 (11.4)                 | 147 (9.8)                         | 0.155    |
| Clopidogrel                                             | 20 (1.3)                   | 17 (1.1)                          | 0.620    |
| Warfarin                                                | 33 (2.2)                   | 34 (2.3)                          | 0.902    |
| Lipid lowering agent                                    |                            |                                   |          |
| Statin                                                  | 99 (6.6)                   | 101 (6.7)                         | 0.884    |
| T2DM medication                                         |                            |                                   |          |
| Insulin                                                 | 64 (4.3)                   | 57 (3.8)                          | 0.516    |
| Metformin                                               | 148 (9.9)                  | 140 (9.3)                         | 0.620    |
| Thiazolidinediones                                      | 10 (0.7)                   | 12 (0.8)                          | 0.669    |
| Sulfonylurea                                            | 148 (9.9)                  | 141 (9.4)                         | 0.665    |
| Numbers of antihypertensive drug class used at baseline |                            |                                   | 0.098    |
| 1                                                       | 1,126 (75.0)               | 1,074 (71.5)                      |          |
| 2                                                       | 316 (21.0)                 | 357 (23.8)                        |          |
| ≥ 3                                                     | 60 (4.0)                   | 71 (4.7)                          |          |
| Add on within two years (not matched)                   |                            |                                   |          |
| Antihypertensive drug not of interest                   |                            |                                   |          |
| Beta-blocker                                            | 93 (6.2)                   | 27 (1.8)                          | <0.001   |
| Alpha-blocker                                           | 31 (2.1)                   | 14 (0.9)                          | 0.011    |

|                                       |            |            |        |
|---------------------------------------|------------|------------|--------|
| Other                                 | 11 (0.7)   | 8 (0.5)    | 0.490  |
| Diuretics not of interest             |            |            |        |
| Thiazide                              | 38 (2.5)   | 21 (1.4)   | 0.025  |
| Loop diuretics                        | 63 (4.2)   | 77 (5.1)   | 0.226  |
| Spironolactone                        | 21 (1.4)   | 31 (2.1)   | 0.162  |
| Number of drugs used within two years |            |            | <0.001 |
| 0                                     | 165 (11.0) | 255 (17.0) |        |
| 1                                     | 930 (61.9) | 896 (59.7) |        |
| ≥ 2                                   | 407 (27.1) | 351 (23.4) |        |

---

CCB, calcium channel blocker; T2DM, Diabetes mellitus type 2; NIHSS, National Institutes of Health Stroke Scale.

Supplemental Table 5. Baseline characteristics of the study patients in the ACEI/ARB and CCB groups after propensity score matching

| Characteristics                       | ACEI/ARB<br>(n = 4,445) | CCB<br>(n = 4,445) | P     |
|---------------------------------------|-------------------------|--------------------|-------|
| Age (years)                           | 63.0±13.6               | 63.1±13.6          | 0.770 |
| Age group                             |                         |                    | 0.759 |
| < 40                                  | 181 (4.1)               | 186 (4.2)          |       |
| 40–75                                 | 3,271 (73.6)            | 3,240 (72.9)       |       |
| > 75                                  | 993 (22.3)              | 1,019 (22.9)       |       |
| Gender                                |                         |                    | 0.467 |
| Male                                  | 2,846 (64.0)            | 2,813 (63.3)       |       |
| Female                                | 1,599 (36.0)            | 1,632 (36.7)       |       |
| Previous myocardial infarction        | 60 (1.3)                | 62 (1.4)           | 0.855 |
| Previous ischemic stroke              | 186 (4.2)               | 182 (4.1)          | 0.831 |
| Previous antiplatelet use             | 1,042 (23.4)            | 1,047 (23.6)       | 0.900 |
| Previous anticoagulant use            | 81 (1.8)                | 76 (1.7)           | 0.687 |
| Comorbidity                           |                         |                    |       |
| Coronary artery disease               | 546 (12.3)              | 521 (11.7)         | 0.415 |
| Chronic kidney disease                | 102 (2.3)               | 99 (2.2)           | 0.831 |
| Hemodialysis                          | 36 (0.8)                | 38 (0.9)           | 0.815 |
| Chronic obstructive pulmonary disease | 253 (5.7)               | 253 (5.7)          | 1.000 |
| Atrial fibrillation                   | 133 (3.0)               | 142 (3.2)          | 0.581 |
| Diabetes mellitus                     | 1,021 (23.0)            | 1,020 (22.9)       | 0.980 |
| Dyslipidemia                          | 672 (15.1)              | 669 (15.1)         | 0.929 |
| Malignancy                            | 153 (3.4)               | 167 (3.8)          | 0.425 |
| NIHSS                                 | 14.2±7.0                | 14.3±6.9           | 0.495 |
| NIHSS group                           |                         |                    | 0.738 |
| ≤ 5                                   | 552 (12.4)              | 531 (11.9)         |       |
| 6-13                                  | 1,578 (35.5)            | 1,570 (35.3)       |       |
| > 13                                  | 2,315 (52.1)            | 2,344 (52.7)       |       |
| Follow up years (not matched)         | 4.5±3.3                 | 4.6±3.4            | 0.227 |
| Anti-thrombotic agent                 |                         |                    |       |
| Aspirin                               | 420 (9.4)               | 405 (9.1)          | 0.583 |
| Clopidogrel                           | 48 (1.1)                | 49 (1.1)           | 0.919 |
| Warfarin                              | 47 (1.1)                | 48 (1.1)           | 0.918 |
| Lipid lowering agent                  |                         |                    |       |
| Statin                                | 476 (10.7)              | 469 (10.6)         | 0.810 |
| T2DM medication                       |                         |                    |       |
| Insulin                               | 142 (3.2)               | 139 (3.1)          | 0.856 |
| Metformin                             | 544 (12.2)              | 548 (12.3)         | 0.897 |
| Thiazolidinediones                    | 46 (1.0)                | 44 (1.0)           | 0.832 |
| Sulfonylurea                          | 526 (11.8)              | 530 (11.9)         | 0.896 |
| Antihypertensive drug not of interest |                         |                    |       |
| Beta-blocker                          | 1,478 (33.3)            | 1,451 (32.6)       | 0.542 |
| Alpha-blocker                         | 396 (8.9)               | 399 (9.0)          | 0.911 |
| Other                                 | 124 (2.8)               | 131 (2.9)          | 0.656 |
| Diuretics not of interest             |                         |                    |       |
| Thiazide                              | 356 (8.0)               | 331 (7.4)          | 0.321 |
| Loop diuretics                        | 426 (9.6)               | 427 (9.6)          | 0.971 |
| Spironolactone                        | 74 (1.7)                | 71 (1.6)           | 0.802 |

|                                                         |              |              |       |
|---------------------------------------------------------|--------------|--------------|-------|
| Numbers of antihypertensive drug class used at baseline |              |              | 0.636 |
| 1                                                       | 2,277 (51.2) | 2,276 (51.2) |       |
| 2                                                       | 1,603 (36.1) | 1,631 (36.7) |       |
| ≥ 3                                                     | 565 (12.7)   | 538 (12.1)   |       |
| Add on within two years (not matched)                   |              |              |       |
| Antihypertensive drug not of interest                   |              |              |       |
| Beta-blocker                                            | 246 (5.5)    | 257 (5.8)    | 0.614 |
| Alpha-blocker                                           | 86 (1.9)     | 84 (1.9)     | 0.877 |
| Other                                                   | 28 (0.6)     | 39 (0.9)     | 0.177 |
| Diuretics not of interest                               |              |              |       |
| Thiazide                                                | 108 (2.4)    | 101 (2.3)    | 0.624 |
| Loop diuretics                                          | 188 (4.2)    | 179 (4.0)    | 0.631 |
| Spironolactone                                          | 54 (1.2)     | 40 (0.9)     | 0.147 |
| Number of drugs used within two years                   |              |              | 0.912 |
| 0                                                       | 370 (8.3)    | 381 (8.6)    |       |
| 1                                                       | 2,217 (49.9) | 2,207 (49.7) |       |
| ≥ 2                                                     | 1,858 (41.8) | 1,857 (41.8) |       |

---

CCB, calcium channel blocker; ACEI, angiotensin-converting enzyme inhibitor; ARB, angiotensin II receptor blocker; NIHSS, National Institutes of Health Stroke Scale; T2DM, Diabetes mellitus type 2.

Supplemental Table 6. Secondary outcomes in the ACEI/ARB and comparison groups after propensity score matching

| Outcome               | ACEI/ARB<br>( <i>n</i> = 1,386) | Comparison<br>( <i>n</i> = 1,386) | ACEI/ARB vs.<br>Comparison |          |
|-----------------------|---------------------------------|-----------------------------------|----------------------------|----------|
|                       |                                 |                                   | HR (95% CI) <sup>†</sup>   | <i>p</i> |
| 2-year follow-up      |                                 |                                   |                            |          |
| Hemodialysis          | 0 (0.0)                         | 2 (0.1)                           | NA                         | NA       |
| Cardiovascular death  | 10 (0.7)                        | 13 (0.9)                          | 0.74 (0.32, 1.69)          | 0.474    |
| Myocardial infarction | 7 (0.5)                         | 3 (0.2)                           | 2.23 (0.58, 8.63)          | 0.245    |
| 5-year follow-up      |                                 |                                   |                            |          |
| Hemodialysis          | 2 (0.1)                         | 6 (0.4)                           | 0.32 (0.06, 1.56)          | 0.158    |
| Cardiovascular death  | 27 (1.9)                        | 23 (1.7)                          | 1.11 (0.63, 1.93)          | 0.726    |
| Myocardial infarction | 12 (0.9)                        | 5 (0.4)                           | 2.25 (0.79, 6.39)          | 0.127    |
| At the last follow-up |                                 |                                   |                            |          |
| Hemodialysis          | 8 (0.6)                         | 9 (0.6)                           | 0.75 (0.28, 2.03)          | 0.576    |
| Cardiovascular death  | 37 (2.7)                        | 39 (2.8)                          | 0.90 (0.57, 1.41)          | 0.639    |
| Myocardial infarction | 22 (1.6)                        | 13 (0.9)                          | 1.59 (0.80, 3.17)          | 0.183    |

HR, hazard ratio; CI, confidence interval; ACEI, angiotensin-converting enzyme inhibitor; ARB, angiotensin II receptor blocker;

<sup>†</sup> Propensity score is additionally treated as a covariate in the model.

Supplemental Table 7. Secondary outcomes in the CCB and comparison groups after propensity score matching

| Outcome               | CCB<br>( <i>n</i> = 1,502) | Comparison<br>( <i>n</i> = 1,502) | CCB vs. Comparison       |          |
|-----------------------|----------------------------|-----------------------------------|--------------------------|----------|
|                       |                            |                                   | HR (95% CI) <sup>†</sup> | <i>p</i> |
| 2-year follow-up      |                            |                                   |                          |          |
| Hemodialysis          | 6 (0.4)                    | 2 (0.1)                           | 2.92 (0.59, 14.45)       | 0.190    |
| Cardiovascular death  | 8 (0.5)                    | 14 (0.9)                          | 0.55 (0.23, 1.30)        | 0.171    |
| Myocardial infarction | 8 (0.5)                    | 3 (0.2)                           | 2.55 (0.68, 9.61)        | 0.167    |
| 5-year follow-up      |                            |                                   |                          |          |
| Hemodialysis          | 10 (0.7)                   | 5 (0.3)                           | 1.87 (0.64, 5.47)        | 0.254    |
| Cardiovascular death  | 16 (1.1)                   | 24 (1.6)                          | 0.62 (0.33, 1.16)        | 0.133    |
| Myocardial infarction | 13 (0.9)                   | 5 (0.3)                           | 2.42 (0.86, 6.80)        | 0.093    |
| At the last follow-up |                            |                                   |                          |          |
| Hemodialysis          | 15 (1.0)                   | 9 (0.6)                           | 1.51 (0.66, 3.45)        | 0.329    |
| Cardiovascular death  | 32 (2.1)                   | 40 (2.7)                          | 0.72 (0.45, 1.15)        | 0.168    |
| Myocardial infarction | 22 (1.5)                   | 13 (0.9)                          | 1.53 (0.77, 3.04)        | 0.224    |

HR, hazard ratio; CI, confidence interval; CCB, calcium channel blocker;

<sup>†</sup> Propensity score is additionally treated as a covariate in the model.

Supplemental Table 8. Secondary outcomes in the ACEI/ARB and CCB groups after propensity score matching

| Outcome               | ACEI/ARB<br>( <i>n</i> = 4,445) | CCB<br>( <i>n</i> = 4,445) | ACEI/ARB vs. CCB         |          |
|-----------------------|---------------------------------|----------------------------|--------------------------|----------|
|                       |                                 |                            | HR (95% CI) <sup>†</sup> | <i>p</i> |
| 2-year follow-up      |                                 |                            |                          |          |
| Hemodialysis          | 5 (0.1)                         | 27 (0.6)                   | 0.18 (0.07, 0.47)        | <0.001   |
| Cardiovascular death  | 32 (0.7)                        | 25 (0.6)                   | 1.27 (0.75, 2.14)        | 0.377    |
| Myocardial infarction | 18 (0.4)                        | 11 (0.2)                   | 1.62 (0.76, 3.43)        | 0.208    |
| 5-year follow-up      |                                 |                            |                          |          |
| Hemodialysis          | 13 (0.3)                        | 47 (1.1)                   | 0.27 (0.14, 0.49)        | <0.001   |
| Cardiovascular death  | 68 (1.5)                        | 54 (1.2)                   | 1.24 (0.87, 1.77)        | 0.242    |
| Myocardial infarction | 36 (0.8)                        | 24 (0.5)                   | 1.48 (0.88, 2.48)        | 0.139    |
| At the last follow-up |                                 |                            |                          |          |
| Hemodialysis          | 29 (0.7)                        | 65 (1.5)                   | 0.42 (0.27, 0.65)        | <0.001   |
| Cardiovascular death  | 99 (2.2)                        | 77 (1.7)                   | 1.29 (0.96, 1.74)        | 0.094    |
| Myocardial infarction | 59 (1.3)                        | 42 (0.9)                   | 1.42 (0.96, 2.11)        | 0.084    |

HR, hazard ratio; CI, confidence interval; CCB, calcium channel blocker; ACEI, angiotensin-converting enzyme inhibitor; ARB, angiotensin II receptor blocker;

<sup>†</sup> Propensity score is additionally treated as a covariate in the model.
